# Supplementary material for: Hydration Status and Fluid Replacement Strategies of High-Performance Adolescent Athletes: An Application of Machine Learning to Distinguish Hydration Characteristics
Source: MDPI journal article supplement (doi:10.3390/nu13114073), 2021-11-15
Supplement: s1 [file s1]

## Supplementary material 5

**Table S5.1. Main effect of pre-training USG hydration classification on fluid consumption rate.**

| Fixed effects             | Estimates<br>(ml/h) | 95% CI<br>(ml/h) | <i>P</i> value | SMD  |
|---------------------------|---------------------|------------------|----------------|------|
| Intercept                 | 334.2               | 280.6 – 387.7    |                |      |
| Hypohydrated <sup>a</sup> | 82.1                | 15.5 – 148.7     | < 0.05         | 0.49 |
| <b>Random effects</b>     |                     |                  |                |      |
| Between subjects SD       | 210.9               |                  |                |      |
| Within subjects SD        | 168.8               |                  |                |      |
| ICC                       | 0.61                |                  |                |      |

Abbreviations: 95% CI, 95% confidence interval; SMD, smallest mean difference

Notes: <sup>a</sup>reference group = Euhydrated.

**Table S5.2. Pairwise comparison between pre-training USG hydration classification for fluid consumption rate.**

| (I) USG status | (J) USG status | Mean<br>Difference (I-J)<br>(ml/h) | SE    | <i>P</i> value <sup>a</sup> | 95% CI for<br>difference<br>(ml/h) |
|----------------|----------------|------------------------------------|-------|-----------------------------|------------------------------------|
| Hypohydrated   | Euhydrated     | 82.1*                              | 33.76 | < 0.05                      | 15.5 – 148.7                       |

Abbreviations: SE, standard error; 95% CI, 95% confidence interval

*Notes:* Based on estimated marginal means; \*The mean difference is significant at the .05 level;

<sup>a</sup>Adjustment for multiple comparisons: Bonferroni.
