# Supplementary material for: Hydration Status and Fluid Replacement Strategies of High-Performance Adolescent Athletes: An Application of Machine Learning to Distinguish Hydration Characteristics
Source: MDPI journal article supplement (doi:10.3390/nu13114073), 2021-11-15
Supplement: s1 [file s1]

Supplementary material 1

Table S1.1. Low-intensity training measures.

|                  | Environment      |              | Pre-training hydration |              | Training         |                   |                 |               |                           |                            |                               |                                  |                    |                                 |
|------------------|------------------|--------------|------------------------|--------------|------------------|-------------------|-----------------|---------------|---------------------------|----------------------------|-------------------------------|----------------------------------|--------------------|---------------------------------|
|                  | Temperature (°c) | Humidity (%) | USG                    | Urine Colour | Pre-training RPE | Post-training RPE | Duration (mins) | Training Load | Pre-training Thirst Level | Post-training Thirst Level | Fluid consumption rate (ml/h) | Percentage of fluid replaced (%) | Sweat rate (ml /h) | Percentage body mass change (%) |
| Badminton        | 26.1 (0.0)       | 69 (0)       | 1.024 (0.005)          | 5.4 (2.0)    | 3.2 (1.6)        | 5.4 (2.3)         | 104.2 (20.8)    | 577 (283)     | 3.2 (1.6)                 | 5.2 (0.9)                  | 578 (400)                     | 81 (22)                          | 733 (400)          | -0.4 (0.4)                      |
| Bowling          | 23.3 (0.0)       | 67 (0)       | 1.020 (0.009)          | 2.9 (1.5)    | 2.5 (1.2)        | 4.5 (1.6)         | 105.6 (1.9)     | 476 (177)     | 3.8 (1.7)                 | 3.7 (1.9)                  | 203 (118)                     | 114 (86)                         | 229 (118)          | 0.0 (0.5)                       |
| Fencing          | 23.0 (0.0)       | 51 (0)       | 1.017 (0.009)          | 3.3 (2.0)    | 1.5 (1.3)        | 4.8 (1.8)         | 66.0 (40.8)     | 348 (276)     | 2.5 (1.3)                 | 4.1 (2.2)                  | 523 (307)                     | 9 (223)                          | 691 (307)          | -0.3 (0.5)                      |
| Football         | 32.9 (0.0)       | 62 (0)       | 1.020 (0.007)          | 5.1 (2.2)    | 0.4 (0.8)        | 4.6 (1.5)         | 90.0 (0.0)      | 414 (136)     | 2.7 (1.3)                 | 4.6 (1.7)                  | 563 (406)                     | 64 (32)                          | 866 (406)          | -0.7 (1.1)                      |
| Netball          | 29.5 (0.0)       | 70 (0)       | 1.013 (0.009)          | 1.8 (1.5)    | 3.2 (1.7)        | 4.7 (1.3)         | 87.5 (9.7)      | 407 (103)     | 3.2 (1.4)                 | 4.9 (1.6)                  | 469 (229)                     | 86 (30)                          | 531 (229)          | -0.2 (0.4)                      |
| Pistol           | 25.4 (0.0)       | 63 (0)       | 1.007 (0.005)          | 1.4 (1.3)    | 3.1 (1.3)        | 3.2 (1.1)         | 65.0 (0.0)      | 209 (71)      | 4.7 (1.9)                 | 5.7 (1.8)                  | 107 (169)                     | 197 (264)                        | 73 (170)           | 0.0 (0.3)                       |
| Rifle            | 25.4 (0.0)       | 63 (0)       | 1.015 (0.007)          | 2.4 (1.9)    | 3.6 (2.3)        | 4.6 (1.7)         | 68.0 (7.6)      | 313 (123)     | 5.6 (1.7)                 | 6.0 (1.2)                  | 210 (133)                     | 159 (153)                        | 234 (133)          | 0.0 (0.3)                       |
| Swimming         | 29.7 (0.0)       | 63 (0)       | 1.017 (0.008)          | 3.4 (1.6)    | 3.5 (1.2)        | 4.4 (2.0)         | 105.0 (0.0)     | 465 (209)     | 3.4 (2.4)                 | 3.6 (2.3)                  | 197 (145)                     | 187 (238)                        | 188 (145)          | -0.7 (0.8)                      |
| Table Tennis     | 26.1 (0.0)       | 69 (0)       | 1.020 (0.007)          | 2.0 (1.5)    | 2.5 (1.0)        | 6.4 (1.5)         | 180.0 (0.0)     | 1152 (273)    | 3.3 (1.8)                 | 4.0 (1.9)                  | 226 (74)                      | 59 (163)                         | 393 (74)           | -0.8 (0.4)                      |
| Track & Field-LD | 25.2 (0.0)       | 81 (0)       | 1.019 (0.008)          | 4.6 (2.3)    | 3.2 (2.0)        | 4.7 (1.6)         | 58.8 (5.5)      | 273 (86)      | 3.8 (1.7)                 | 4.5 (1.7)                  | 392 (200)                     | 77 (35)                          | 565 (200)          | -0.3 (0.4)                      |
| Track & Field-SD | 28.1 (0.0)       | 80 (0)       | 1.018 (0.007)          | 3.5 (2.3)    | 4.8 (2.1)        | 5.5 (1.3)         | 60.0 (0.0)      | 338 (71)      | 5.3 (1.6)                 | 6.5 (0.9)                  | 289 (161)                     | 48 (23)                          | 582 (161)          | -0.5 (0.2)                      |
| Female           | 26.9 (2.3)       | 69 (8)       | 1.015 (0.009)          | 2.6 (2.1)    | 3.2 (1.7)        | 4.8 (1.5)         | 87.9 (30.8)     | 427 (227)     | 3.8 (1.8)                 | 4.9 (1.8)                  | 321 (229)                     | 103 (112)                        | 398 (245)          | -0.2 (0.4)                      |
| Male             | 26.7 (3.3)       | 66 (9)       | 1.019 (0.008)          | 4.0 (2.2)    | 2.6 (1.9)        | 4.8 (1.8)         | 87.1 (34.3)     | 425 (283)     | 3.5 (1.8)                 | 4.7 (1.8)                  | 401 (326)                     | 87 (151)                         | 560 (415)          | -0.4 (0.6)                      |
| Overall          | 26.8 (3.0)       | 67 (9)       | 1.018 (0.008)          | 3.5 (2.2)    | 2.8 (1.8)        | 4.8 (1.7)         | 87.4 (32.9)     | 426 (263)     | 3.6 (1.8)                 | 4.8 (1.8)                  | 371 (295)                     | 93 (138)                         | 500 (369)          | -0.3 (0.6)                      |

Abbreviations: USG = Urine specific gravity; LD = Long distance (> 400 m distance events), SD = Short distance (≤ 400 m distance events)

Note: Data expressed as mean (SD).

**Table S1.2. High-intensity training measures.**

|                  | Environment      |              | Pre-training hydration |              | Training         |                   |                 |               |                           |                            |                               |                                  |                   |                                 |
|------------------|------------------|--------------|------------------------|--------------|------------------|-------------------|-----------------|---------------|---------------------------|----------------------------|-------------------------------|----------------------------------|-------------------|---------------------------------|
|                  | Temperature (°c) | Humidity (%) | USG                    | Urine Colour | Pre-training RPE | Post-training RPE | Duration (mins) | Training Load | Pre-training Thirst Level | Post-training Thirst Level | Fluid consumption rate (ml/h) | Percentage of fluid replaced (%) | Sweat rate (ml/h) | Percentage body mass change (%) |
| Badminton        | 30.1 (0.0)       | 66 (0)       | 1.018 (0.009)          | 3.4 (2.4)    | 3.1 (1.3)        | 8.5 (1.6)         | 126.9 (13.2)    | 1093 (279)    | 3.5 (1.6)                 | 6 (1.5)                    | 656 (290)                     | 79 (29)                          | 8557 (326)        | -0.6 (0.9)                      |
| Bowling          | 23.7 (0.0)       | 66 (0)       | 1.016 (0.009)          | 2.8 (1.6)    | 3.3 (1.7)        | 4.9 (1.4)         | 77.4 (2.7)      | 380 (117)     | 4.6 (1.9)                 | 5 (2.2)                    | 228 (96)                      | 62 (27)                          | 387 (101)         | -0.3 (0.3)                      |
| Fencing          | 23 (0.0)         | 51 (0)       | 1.020 (0.009)          | 4.4 (2.5)    | 0.8 (0.8)        | 4.9 (1.4)         | 109.1 (13.6)    | 545 (192)     | 3.7 (1.2)                 | 4.1 (1.8)                  | 377 (258)                     | 98 (61)                          | 393 (135)         | -0.2 (0.6)                      |
| Football         | 34.7 (0.0)       | 52 (0)       | 1.015 (0.009)          | 3.6 (2.4)    | 0.6 (1.1)        | 5.1 (1.6)         | 82.0 (0.0)      | 418 (135)     | 2.7 (1.1)                 | 5.8 (1.7)                  | 527 (211)                     | 58 (23)                          | 921 (205)         | -1.1 (0.6)                      |
| Netball          | 29.3 (0.0)       | 70 (0)       | 1.013 (0.01)           | 2.6 (2.4)    | 3.3 (1.9)        | 6.2 (1.4)         | 63.3 (5.6)      | 386 (72)      | 3.5 (1.7)                 | 5.9 (1.5)                  | 462 (321)                     | 68 (36)                          | 622 (135)         | -0.4 (0.4)                      |
| Pistol           | 26.3 (0.0)       | 68 (0)       | 1.009 (0.007)          | 1.7 (1.7)    | 3.7 (1.6)        | 3.8 (2.5)         | 96.7 (10.9)     | 360 (219)     | 4.0 (1.7)                 | 3.7 (1.6)                  | 173 (102)                     | 225 (221)                        | 157 (164)         | 0.1 (0.5)                       |
| Rifle            | 23.6 (0.0)       | 59 (0)       | 1.014 (0.006)          | 3.0 (0.7)    | 3.2 (1.9)        | 5.6 (2.1)         | 90.0 (0.0)      | 504 (187)     | 5.0 (1.9)                 | 6.6 (0.5)                  | 184 (101)                     | 114 (48)                         | 173 (111)         | 0.0 (0.2)                       |
| Swimming         | 31.0 (0.0)       | 61 (0)       | 1.018 (0.006)          | 3.0 (1.8)    | 4.1 (2)          | 6.4 (2.3)         | 120.0 (0.0)     | 765 (272)     | 3.0 (1.6)                 | 4.4 (2.6)                  | 285 (210)                     | 66 (74)                          | 201 (248)         | -0.3 (0.5)                      |
| Table Tennis     | 19.9 (0.0)       | 64 (0)       | 1.020 (0.008)          | 4.0 (2.3)    | 3.0 (1.1)        | 6.0 (1.8)         | 135.0 (0.0)     | 810 (242)     | 4.0 (1.1)                 | 4.3 (1.9)                  | 403 (99)                      | 82 (20)                          | 501 (121)         | -0.4 (0.4)                      |
| Track & Field-LD | 30.5 (0.0)       | 70 (0)       | 1.012 (0.009)          | 2.5 (1.7)    | 3.1 (2.5)        | 4.3 (2.5)         | 102.7 (16.9)    | 454 (266)     | 3.4 (1.6)                 | 4.5 (1.9)                  | 188 (165)                     | 70 (106)                         | 386 (338)         | -0.6 (0.8)                      |
| Track & Field-SD | 31.7 (0.0)       | 61 (0)       | 1.017 (0.008)          | 2.6 (1.4)    | 5.0 (2.5)        | 4.9 (1.4)         | 60.0 (0.0)      | 293 (81)      | 4.8 (1.8)                 | 5.8 (2.0)                  | 307 (129)                     | 56 (20)                          | 547 (151)         | -0.4 (0.2)                      |
| Female           | 28.1 (3.4)       | 65 (5)       | 1.013 (0.009)          | 2.5 (20.)    | 3.6 (1.9)        | 5.5 (2.2)         | 88.8 (29.2)     | 503 (327)     | 4.1 (1.7)                 | 5.1 (2.1)                  | 346 (235)                     | 94 (103)                         | 433 (244)         | -0.3 (0.5)                      |
| Male             | 28.2 (4.6)       | 61 (7)       | 1.017 (0.009)          | 3.3 (2.0.)   | 2.5 (2.1)        | 5.5 (2.2)         | 101.0 (21.2)    | 575 (299)     | 3.5 (1.6)                 | 5.1 (1.9)                  | 370 (269)                     | 82 (84)                          | 540 (360)         | -0.5 (0.7)                      |
| Overall          | 28.2 (4.2)       | 63 (7)       | 1.015 (0.009)          | 3.0 (2.0)    | 2.9 (2.1)        | 5.5 (2.2)         | 96.4 (25)       | 547 (310)     | 3.7 (1.6)                 | 5.1 (1.9)                  | 361 (256)                     | 87 (91)                          | 501 (324)         | -0.4 (0.6)                      |

Abbreviations: USG = Urine specific gravity; LD = Long distance, SD = Short distance

*Note:* Data expressed as mean (SD).
