# Supplementary material for: Hydration Status and Fluid Replacement Strategies of High-Performance Adolescent Athletes: An Application of Machine Learning to Distinguish Hydration Characteristics
Source: MDPI journal article supplement (doi:10.3390/nu13114073), 2021-11-15
Supplement: s1 [file s1]

### Supplementary material 3

**Table S3.1. Main effect of sport on percentage body mass change.**

| Fixed effects                 | Estimates | 95% CI       | P value | SMD   |
|-------------------------------|-----------|--------------|---------|-------|
| Intercept                     | -0.44     | -0.76– -0.12 |         |       |
| Badminton <sup>a</sup>        | -0.07     | -0.48–0.33   | 0.72    | -0.15 |
| Bowling <sup>a</sup>          | 0.26      | -0.16– 0.69  | 0.23    | 0.54  |
| Fencing <sup>a</sup>          | 0.22      | -0.2–0.63    | 0.31    | 0.44  |
| Football <sup>a</sup>         | -0.50     | -0.92– -0.08 | < 0.05  | -1.03 |
| Netball <sup>a</sup>          | 0.17      | -0.24–0.59   | 0.41    | 0.36  |
| Pistol <sup>a</sup>           | 0.49      | 0.05–0.92    | 0.03    | 1.01  |
| Rifle <sup>a</sup>            | 0.43      | -0.08–0.94   | 0.10    | 0.89  |
| Swimming <sup>a</sup>         | -0.05     | -0.5–0.4     | 0.83    | -0.1  |
| Table tennis <sup>a</sup>     | -0.14     | -0.62–0.35   | 0.58    | -0.28 |
| Track & Field-LD <sup>a</sup> | -0.02     | -0.43–0.38   | 0.90    | -0.05 |
| <b>Random effects</b>         |           |              |         |       |
| Between subjects SD           | 0.29      |              |         |       |
| Within subjects SD            | 0.48      |              |         |       |
| ICC                           | 0.27      |              |         |       |

Abbreviations: 95% CI, 95% confidence interval; SMD, smallest mean difference; LD, Long Distance (> 400 m distance events), SD = Short distance ( $\leq$  400 m distance events)

Note: <sup>a</sup>reference group = Track & Field-SD ( $\leq$  400 m distance events).

**Table S3.2. Pairwise comparison between sports for percentage body mass change.**

| <b>(I) Sport</b> | <b>(J) Sport</b> | <b>Mean<br/>difference<br/>(I-J)</b> | <b>SE</b> | <b>P value<sup>a</sup></b> | <b>95% CI for<br/>difference<br/>(%)</b> |
|------------------|------------------|--------------------------------------|-----------|----------------------------|------------------------------------------|
| Badminton        | Bowling          | -0.34                                | 0.19      | 1.00                       | -0.99–0.32                               |
|                  | Fencing          | -0.29                                | 0.19      | 1.00                       | -0.92–0.34                               |
|                  | Football         | 0.42                                 | 0.19      | 1.00                       | -0.21–1.06                               |
|                  | Netball          | -0.25                                | 0.19      | 1.00                       | -0.88–0.39                               |
|                  | Pistol           | -0.56                                | 0.20      | 0.28                       | -1.23–0.11                               |
|                  | Rifle            | -0.51                                | 0.24      | 1.00                       | -1.32–0.31                               |
|                  | Swimming         | -0.03                                | 0.20      | 1.00                       | -0.72–0.67                               |
|                  | Table tennis     | 0.06                                 | 0.22      | 1.00                       | -0.7–0.83                                |
|                  | Track & Field-LD | -0.05                                | 0.18      | 1.00                       | -0.66–0.56                               |
|                  | Track & Field-SD | -0.07                                | 0.20      | 1.00                       | -0.77–0.62                               |
| Bowling          | Fencing          | 0.05                                 | 0.20      | 1.00                       | -0.63–0.72                               |
|                  | Football         | 0.76*                                | 0.20      | < 0.05                     | 0.08–1.44                                |
|                  | Netball          | 0.09                                 | 0.20      | 1.00                       | -0.59–0.76                               |
|                  | Pistol           | -0.23                                | 0.21      | 1.00                       | -0.94–0.48                               |
|                  | Rifle            | -0.17                                | 0.25      | 1.00                       | -1.02–0.68                               |
|                  | Swimming         | 0.31                                 | 0.21      | 1.00                       | -0.43–1.04                               |
|                  | Table tennis     | 0.40                                 | 0.23      | 1.00                       | -0.4–1.2                                 |
|                  | Track & Field-LD | 0.29                                 | 0.19      | 1.00                       | -0.37–0.94                               |
|                  | Track & Field-SD | 0.26                                 | 0.21      | 1.00                       | -0.47–1                                  |
| Fencing          | Football         | 0.71*                                | 0.19      | < 0.05                     | 0.05–1.37                                |
|                  | Netball          | 0.04                                 | 0.19      | 1.00                       | -0.62–0.70                               |
|                  | Pistol           | -0.27                                | 0.20      | 1.00                       | -0.97–0.42                               |
|                  | Rifle            | -0.22                                | 0.24      | 1.00                       | -1.05–0.62                               |
|                  | Swimming         | 0.26                                 | 0.21      | 1.00                       | -0.46–0.98                               |
|                  | Table tennis     | 0.35                                 | 0.23      | 1.00                       | -0.43–1.14                               |
|                  | Track & Field-LD | 0.24                                 | 0.19      | 1.00                       | -0.39–0.87                               |
|                  | Track & Field-SD | 0.22                                 | 0.21      | 1.00                       | -0.5–0.93                                |
| Football         | Netball          | -0.67*                               | 0.19      | < 0.05                     | -1.33– -0.01                             |
|                  | Pistol           | -0.99**                              | 0.20      | < 0.01                     | -1.68– -0.29                             |
|                  | Rifle            | -0.93*                               | 0.24      | < 0.05                     | -1.77– -0.1                              |
|                  | Swimming         | -0.45                                | 0.21      | 1.00                       | -1.17–0.27                               |
|                  | Table tennis     | -0.36                                | 0.23      | 1.00                       | -1.15–0.42                               |
|                  | Track & Field-LD | -0.47                                | 0.19      | 0.66                       | -1.11–0.16                               |
|                  | Track & Field-SD | -0.50                                | 0.21      | 1.00                       | -1.22–0.22                               |

|                  |                  |       |      |      |            |
|------------------|------------------|-------|------|------|------------|
| Netball          | Pistol           | -0.32 | 0.20 | 1.00 | -1.01–0.38 |
|                  | Rifle            | -0.26 | 0.24 | 1.00 | -1.1–0.57  |
|                  | Swimming         | 0.22  | 0.21 | 1.00 | -0.5–0.94  |
|                  | Table tennis     | 0.31  | 0.23 | 1.00 | -0.48–1.09 |
|                  | Track & Field-LD | 0.20  | 0.19 | 1.00 | -0.44–0.83 |
|                  | Track & Field-SD | 0.17  | 0.21 | 1.00 | -0.55–0.89 |
| Pistol           | Rifle            | 0.06  | 0.25 | 1.00 | -0.81–0.92 |
|                  | Swimming         | 0.54  | 0.22 | 0.90 | -0.22–1.29 |
|                  | Table tennis     | 0.62  | 0.24 | 0.56 | -0.19–1.44 |
|                  | Track & Field-LD | 0.51  | 0.20 | 0.57 | -0.16–1.18 |
|                  | Track & Field-SD | 0.49  | 0.22 | 1.00 | -0.26–1.24 |
| Rifle            | Swimming         | 0.48  | 0.26 | 1.00 | -0.4–1.36  |
|                  | Table tennis     | 0.57  | 0.27 | 1.00 | -0.37–1.51 |
|                  | Track & Field-LD | 0.46  | 0.24 | 1.00 | -0.36–1.27 |
|                  | Track & Field-SD | 0.43  | 0.26 | 1.00 | -0.45–1.32 |
| Swimming         | Table tennis     | 0.09  | 0.24 | 1.00 | -0.75–0.92 |
|                  | Track & Field-LD | -0.02 | 0.20 | 1.00 | -0.72–0.67 |
|                  | Track & Field-SD | -0.05 | 0.23 | 1.00 | -0.82–0.73 |
| Table tennis     | Track & Field-LD | -0.11 | 0.22 | 1.00 | -0.88–0.65 |
|                  | Track & Field-SD | -0.14 | 0.24 | 1.00 | -0.97–0.7  |
| Track & Field-LD | Track & Field-SD | -0.03 | 0.20 | 1.00 | -0.72–0.67 |

Abbreviations: SE, standard error; 95% CI, 95% confidence interval; LD = Long distance (> 400 m distance events), SD = Short distance ( $\leq$  400 m distance events)

Notes: Based on estimated marginal means; \*The mean difference is significant at the .05 level; \*\*The mean difference is significant at the .01 level;

<sup>a</sup>Adjustment for multiple comparisons: Bonferroni.
