# Supplementary material for: Hydration Status and Fluid Replacement Strategies of High-Performance Adolescent Athletes: An Application of Machine Learning to Distinguish Hydration Characteristics
Source: MDPI journal article supplement (doi:10.3390/nu13114073), 2021-11-15
Supplement: s1 [file s1]

## Supplementary material 4

**Table S4.1. Main effects of gender on sweat rate and percentage body mass change.**

| Fixed effects         | Sweat rate (per hour) |               |         |      | Percentage body mass change (%) |               |         |       |
|-----------------------|-----------------------|---------------|---------|------|---------------------------------|---------------|---------|-------|
|                       | Estimates             | 95% CI        | P value | SMD  | Estimates                       | 95% CI        | P value | SMD   |
| Intercept             | 415.6                 | 317.4 – 513.8 |         |      | -0.23                           | -0.39 – -0.07 |         |       |
| Male <sup>a</sup>     | 134.6                 | 10.7 – 258.5  | < 0.05  | 0.65 | -0.25                           | -0.45 – -0.05 | < 0.05  | -0.52 |
| <b>Random effects</b> |                       |               |         |      |                                 |               |         |       |
| Between subjects SD   | 272.5                 |               |         |      | 0.35                            |               |         |       |
| Within subjects SD    | 206.8                 |               |         |      | 0.48                            |               |         |       |
| ICC                   | 0.63                  |               |         |      | 0.35                            |               |         |       |

Abbreviations: 95% CI, 95% confidence interval; SMD, smallest mean difference

Notes: <sup>a</sup> reference group = Female.

**Table S4.2. Pairwise comparison between genders for sweat rate.**

| (I) Gender | (J) Gender | Mean Difference | SE   | <i>P</i> value <sup>a</sup> | 95% CI for difference<br>(ml/h) |
|------------|------------|-----------------|------|-----------------------------|---------------------------------|
|            |            | (I-J)<br>(ml/h) |      |                             |                                 |
| Male       | Female     | 134.6*          | 62.5 | < 0.05                      | 10.7 – 258.5                    |

Abbreviations: SE, standard error; 95% CI, 95% confidence interval

*Notes:* Based on estimated marginal means; \*The mean difference is significant at the .05 level;

<sup>a</sup>Adjustment for multiple comparisons: Bonferroni.

**Table S4.3. Pairwise comparison between genders for percentage body mass change.**

| (I) Gender | (J) Gender | Mean<br>Difference (I-J)<br>(%) | SE   | <i>P</i> value <sup>a</sup> | 95% CI for<br>difference<br>(%) |
|------------|------------|---------------------------------|------|-----------------------------|---------------------------------|
| Male       | Female     | -0.25*                          | 0.10 | < 0.05                      | -0.45 – -0.05                   |

Abbreviations: SE, standard error; 95% CI, 95% confidence interval

*Notes:* Based on estimated marginal means; \*The mean difference is significant at the .05 level;

<sup>a</sup>Adjustment for multiple comparisons: Bonferroni.
