# Supplementary material for: Hydration Status and Fluid Replacement Strategies of High-Performance Adolescent Athletes: An Application of Machine Learning to Distinguish Hydration Characteristics
Source: MDPI journal article supplement (doi:10.3390/nu13114073), 2021-11-15
Supplement: s1 [file s1]

## Supplementary material 2

**Table S2.1. Pairwise comparison between sports for sweat rate.**

| (I) Sport | (J) Sport        | Mean difference (I-J) (ml/h) | SE    | P value <sup>a</sup> | 95% CI for difference (ml/h) |
|-----------|------------------|------------------------------|-------|----------------------|------------------------------|
| Badminton | Bowling          | 485.9**                      | 91.4  | < 0.01               | 172.6–799.2                  |
|           | Fencing          | 252.0                        | 89.1  | 0.31                 | -53.1–557.1                  |
|           | Football         | -99.4                        | 89.1  | 1.00                 | -404.5–205.8                 |
|           | Netball          | 217.8                        | 89.1  | 0.90                 | -87.3–522.9                  |
|           | Pistol           | 679.1**                      | 94.3  | < 0.01               | 356.2–1002.1                 |
|           | Rifle            | 590.4**                      | 114.4 | < 0.01               | 198.5–982.4                  |
|           | Swimming         | 599.3**                      | 97.7  | < 0.01               | 264.6–934                    |
|           | Table tennis     | 347.3                        | 107.3 | 0.09                 | -20.3–714.9                  |
|           | Track & Field-LD | 318.3*                       | 85.3  | < 0.05               | 26.1–610.4                   |
|           | Track & Field-SD | 229.4                        | 97.7  | 1.00                 | -105.3–564.1                 |
| Bowling   | Fencing          | -233.9                       | 95.0  | 0.86                 | -559.3–91.5                  |
|           | Football         | -585.2**                     | 95.0  | < 0.01               | -910.7– -259.8               |
|           | Netball          | -268.1                       | 95.0  | 0.32                 | -593.5–57.3                  |
|           | Pistol           | 193.2                        | 99.9  | 1.00                 | -149–535.5                   |
|           | Rifle            | 104.5                        | 119.1 | 1.00                 | -303.4–512.5                 |
|           | Swimming         | 113.4                        | 103.1 | 1.00                 | -239.9–466.7                 |
|           | Table tennis     | -138.6                       | 112.3 | 1.00                 | -523.2–246.1                 |
|           | Track & Field-LD | -167.6                       | 91.4  | 1.00                 | -480.9–145.7                 |
|           | Track & Field-SD | -256.5                       | 103.1 | 0.80                 | -609.8–96.8                  |
| Fencing   | Football         | -351.4*                      | 92.7  | < 0.05               | -668.9– -33.8                |
|           | Netball          | -34.2                        | 92.7  | 1.00                 | -351.8–283.4                 |
|           | Pistol           | 427.1**                      | 97.7  | < 0.01               | 92.4–761.9                   |
|           | Rifle            | 338.4                        | 117.2 | 0.27                 | -63.3–740.1                  |
|           | Swimming         | 347.3                        | 101.0 | 0.05                 | 1.2–693.4                    |
|           | Table tennis     | 95.3                         | 110.3 | 1.00                 | -282.7–473.3                 |
|           | Track & Field-LD | 66.3                         | 89.1  | 1.00                 | -238.9–371.4                 |
|           | Track & Field-SD | -22.6                        | 101.0 | 1.00                 | -368.7–323.5                 |
| Football  | Netball          | 317.1                        | 92.7  | 0.05                 | -0.5–634.7                   |
|           | Pistol           | 778.5**                      | 97.7  | < 0.01               | 443.7–1113.2                 |
|           | Rifle            | 689.8**                      | 117.2 | < 0.01               | 288.1–1091.5                 |
|           | Swimming         | 698.7**                      | 101.0 | < 0.01               | 352.6–1044.7                 |
|           | Table tennis     | 446.7*                       | 110.3 | < 0.05               | 68.7–824.7                   |
|           | Track & Field-LD | 417.6**                      | 89.1  | < 0.01               | 112.5–722.7                  |
|           | Track & Field-SD | 328.7                        | 101.0 | 0.09                 | -17.3–674.8                  |
| Netball   | Pistol           | 461.3**                      | 97.7  | < 0.01               | 126.6–796.1                  |
|           | Rifle            | 372.6                        | 117.2 | 0.11                 | -29.1–774.4                  |
|           | Swimming         | 381.5*                       | 101.0 | < 0.05               | 35.5–727.6                   |
|           | Table tennis     | 129.5                        | 110.3 | 1.00                 | -248.5–507.5                 |
|           | Track & Field-LD | 100.5                        | 89.1  | 1.00                 | -204.6–405.6                 |
|           | Track & Field-SD | 11.6                         | 101.0 | 1.00                 | -334.5–357.7                 |
| Pistol    | Rifle            | -88.7                        | 121.3 | 1.00                 | -504.1–326.7                 |
|           | Swimming         | -79.8                        | 105.6 | 1.00                 | -441.7–282.1                 |
|           | Table tennis     | -331.8                       | 114.6 | 0.26                 | -724.3–60.7                  |
|           | Track & Field-LD | -360.9*                      | 94.3  | < 0.05               | -683.8–37.9                  |
|           | Track & Field-SD | -449.7**                     | 105.6 | < 0.01               | -811.6–87.8                  |
| Rifle     | Swimming         | 8.9                          | 123.9 | 1.00                 | -415.7–433.5                 |
|           | Table tennis     | -243.1                       | 131.6 | 1.00                 | -694.1– 207.9                |

|                  |                  |        |       |      |               |
|------------------|------------------|--------|-------|------|---------------|
|                  | Track & Field-LD | -272.2 | 114.4 | 1.00 | -664.1– 119.8 |
|                  | Track & Field-SD | -361.0 | 123.9 | 0.25 | -785.6–63.6   |
| Swimming         | Table tennis     | -252.0 | 117.4 | 1.00 | -654.2–150.3  |
|                  | Track & Field-LD | -281.1 | 97.7  | 0.27 | -615.7–53.6   |
|                  | Track & Field-SD | -369.9 | 108.7 | 0.05 | -742.3–2.5    |
| Table tennis     | Track & Field-LD | -29.1  | 107.3 | 1.00 | -396.7–338.5  |
|                  | Track & Field-SD | -117.9 | 117.4 | 1.00 | -520.2–284.3  |
| Track & Field-LD | Track & Field-SD | -88.9  | 97.7  | 1.00 | -423.5–245.8  |

Abbreviations: SE, standard error; 95% CI, 95% confidence interval; LD = Long distance (> 400 m distance events), SD = Short distance ( $\leq$  400 m distance events)

*Notes:* Based on estimated marginal means; \*The mean difference is significant at the .05 level; \*\*The mean difference is significant at the .01 level; <sup>a</sup>Adjustment for multiple comparisons: Bonferroni.

**Table S2.2. Pairwise comparison between sessions for sweat rate.**

| <b>(I) Session</b> | <b>(J) Session</b> | <b>Mean<br/>Difference (I-J)<br/>(ml/h)</b> | <b>SE</b> | <b><i>P</i> value<sup>a</sup></b> | <b>95% CI for<br/>difference<br/>(ml/h)</b> |
|--------------------|--------------------|---------------------------------------------|-----------|-----------------------------------|---------------------------------------------|
| High intensity     | Low intensity      | 5.4                                         | 27.51     | 0.845                             | -49.2–60.0                                  |

Abbreviations: SE, standard error; 95% CI, 95% confidence interval

*Notes:* Based on estimated marginal means; <sup>a</sup>Adjustment for multiple comparisons: Bonferroni.

**Table S2.3. Pairwise comparison between sports for fluid consumption rate.**

| (I) Group | (J) Group        | Mean<br>Difference (I-J)<br>(ml/h) | SE    | <i>P</i> value <sup>a</sup> | 95% CI for<br>difference<br>(ml/h) |
|-----------|------------------|------------------------------------|-------|-----------------------------|------------------------------------|
| Badminton | Bowling          | 401.0**                            | 87.2  | < 0.01                      | 102.4–699.7                        |
|           | Fencing          | 166.8                              | 84.9  | 1.00                        | -124–457.7                         |
|           | Football         | 71.7                               | 84.9  | 1.00                        | -219.2–362.6                       |
|           | Netball          | 151.1                              | 84.9  | 1.00                        | -139.7–442                         |
|           | Pistol           | 476.4**                            | 89.9  | < 0.01                      | 168.5–784.3                        |
|           | Rifle            | 419.8*                             | 109.0 | < 0.05                      | 46.2–793.4                         |
|           | Swimming         | 375.9*                             | 93.1  | < 0.05                      | 56.8–694.9                         |
|           | Table tennis     | 302.2                              | 102.3 | 0.22                        | -48.2–652.6                        |
|           | Track & Field-LD | 326.4*                             | 81.3  | < 0.05                      | 47.9–604.9                         |
|           | Track & Field-SD | 318.3                              | 93.1  | 0.05                        | -0.7–637.3                         |
| Bowling   | Fencing          | -234.2                             | 90.5  | 0.62                        | -544.4–76                          |
|           | Football         | -329.3*                            | 90.5  | < 0.05                      | -639.5–19.1                        |
|           | Netball          | -249.9                             | 90.5  | 0.38                        | -560.1–60.3                        |
|           | Pistol           | 75.4                               | 95.2  | 1.00                        | -250.8–401.6                       |
|           | Rifle            | 18.8                               | 113.5 | 1.00                        | -370.1–407.6                       |
|           | Swimming         | -25.1                              | 98.3  | 1.00                        | -361.9–311.6                       |
|           | Table tennis     | -98.8                              | 107.0 | 1.00                        | -465.5–267.8                       |
|           | Track & Field-LD | -74.6                              | 87.2  | 1.00                        | -373.2–224                         |
|           | Track & Field-SD | -82.7                              | 98.3  | 1.00                        | -419.5–254                         |
| Fencing   | Football         | -95.1                              | 88.4  | 1.00                        | -397.9–207.6                       |
|           | Netball          | -15.7                              | 88.4  | 1.00                        | -318.5–287                         |
|           | Pistol           | 309.6                              | 93.1  | 0.07                        | -9.5–628.7                         |
|           | Rifle            | 253.0                              | 111.8 | 1.00                        | -130–635.9                         |
|           | Swimming         | 209.1                              | 96.3  | 1.00                        | -120.8–539                         |
|           | Table tennis     | 135.4                              | 105.2 | 1.00                        | -225–495.7                         |
|           | Track & Field-LD | 159.6                              | 84.9  | 1.00                        | -131.3–450.5                       |
|           | Track & Field-SD | 151.5                              | 96.3  | 1.00                        | -178.4–481.4                       |
| Football  | Netball          | 79.4                               | 88.4  | 1.00                        | -223.3–382.1                       |
|           | Pistol           | 404.7**                            | 93.1  | < 0.01                      | 85.6–723.8                         |
|           | Rifle            | 348.1                              | 111.8 | 0.13                        | -34.9–731                          |
|           | Swimming         | 304.2                              | 96.3  | 0.12                        | -25.7–634.1                        |
|           | Table tennis     | 230.5                              | 105.2 | 1.00                        | -129.9–590.8                       |
|           | Track & Field-LD | 254.7                              | 84.9  | 0.19                        | -36.2–545.6                        |
|           | Track & Field-SD | 246.6                              | 96.3  | 0.66                        | -83.3–576.5                        |
| Netball   | Pistol           | 325.3*                             | 93.1  | < 0.05                      | 6.2–644.4                          |
|           | Rifle            | 268.7                              | 111.8 | 1.00                        | -114.3–651.6                       |
|           | Swimming         | 224.8                              | 96.3  | 1.00                        | -105.1–554.7                       |
|           | Table tennis     | 151.1                              | 105.2 | 1.00                        | -209.3–511.4                       |
|           | Track & Field-LD | 175.3                              | 84.9  | 1.00                        | -115.6–466.2                       |
|           | Track & Field-SD | 167.2                              | 96.3  | 1.00                        | -162.7–497.1                       |
| Pistol    | Rifle            | -56.6                              | 115.6 | 1.00                        | -452.6–339.4                       |
|           | Swimming         | -100.5                             | 100.7 | 1.00                        | -445.5–244.5                       |
|           | Table tennis     | -174.2                             | 109.2 | 1.00                        | -548.4–200                         |
|           | Track & Field-LD | -150.0                             | 89.9  | 1.00                        | -457.8–157.9                       |
|           | Track & Field-SD | -158.1                             | 100.7 | 1.00                        | -503.1–186.9                       |
| Rifle     | Swimming         | -43.9                              | 118.1 | 1.00                        | -448.7–360.9                       |
|           | Table tennis     | -117.6                             | 125.5 | 1.00                        | -547.5–312.3                       |
|           | Track & Field-LD | -93.4                              | 109.0 | 1.00                        | -467–280.3                         |
|           | Track & Field-SD | -101.5                             | 118.1 | 1.00                        | -506.3–303.3                       |
| Swimming  | Table tennis     | -73.7                              | 111.9 | 1.00                        | -457.1–309.7                       |

|                  |                  |       |       |      |              |
|------------------|------------------|-------|-------|------|--------------|
|                  | Track & Field-LD | -49.5 | 93.1  | 1.00 | -368.5–269.6 |
|                  | Track & Field-SD | -57.6 | 103.6 | 1.00 | -412.6–297.4 |
| Table tennis     | Track & Field-LD | 24.2  | 102.3 | 1.00 | -326.2–374.6 |
|                  | Track & Field-SD | 16.1  | 111.9 | 1.00 | -367.3–399.5 |
| Track & Field-LD | Track & Field-SD | -8.1  | 93.1  | 1.00 | -327.2–310.9 |

Abbreviations: SE, standard error; 95% CI, 95% confidence interval; LD = Long distance (> 400 m distance events), SD = Short distance ( $\leq$  400 m distance events)

*Notes:* Based on estimated marginal means; \*The mean difference is significant at the .05 level;

\*\*The mean difference is significant at the .01 level; <sup>a</sup>Adjustment for multiple comparisons: Bonferroni.

**Table S2.4. Pairwise comparison between sessions for fluid consumption rate.**

| <b>(I) Session</b> | <b>(J) Session</b> | <b>Mean<br/>Difference (I-J)<br/>(ml/h)</b> | <b>SE</b> | <b><i>P</i> value<sup>a</sup></b> | <b>95% CI for<br/>difference<br/>(ml/h)</b> |
|--------------------|--------------------|---------------------------------------------|-----------|-----------------------------------|---------------------------------------------|
| High intensity     | Low intensity      | 2.9                                         | 22.9      | 0.90                              | -42.5–48.4                                  |

Abbreviations: SE, standard error; 95% CI, 95% confidence interval

*Notes:* Based on estimated marginal means; <sup>a</sup>Adjustment for multiple comparisons: Bonferroni.
