# Supplementary material for: Hydration Status and Fluid Replacement Strategies of High-Performance Adolescent Athletes: An Application of Machine Learning to Distinguish Hydration Characteristics
Source: Nutrients. 2021 Nov 15;13(11):4073. doi: 10.3390/nu13114073 (PMC8625246; doi:10.3390/nu13114073)
Supplement: Supplementary file 1 [file nutrients-13-04073-s001.zip]

Archive with 5 entries (5 files):
- Supplementary material 1.pdf
- Supplementary material 2.pdf
- Supplementary material 3.pdf
- Supplementary material 4.pdf
- Supplementary material 5.pdf
